# Supplementary material
Source: PubMed Central journal article supplement (PMC7347285)
Supplement: NIHMS1552775-supplement-Supplemental_Material.pdf [file NIHMS1552775-supplement-Supplemental_Material.pdf]

## SUPPLEMENTAL MATERIAL

**Supplemental Table 1**

|                                                   | HFpEF       | Senior Controls | P value |
|---------------------------------------------------|-------------|-----------------|---------|
| Tissue Doppler e' velocity septal annulus (cm/s)  | 5.7 ± 1.5   | 7.8 ± 1.3       | 0.001   |
| Tissue Doppler e' velocity lateral annulus (cm/s) | 7.8 ± 2.0   | 9.5 ± 2.3       | 0.11    |
| E/e'                                              | 14.2 ± 3.8  | 8.9 ± 3.2       | 0.008   |
| E/A ratio                                         | 1.06 ± 0.49 | 0.99 ± 0.16     | 0.69    |
| Left ventricular ejection fraction (%)            | 55.6 ± 2.2  | 59.6 ± 3.0      | 0.03    |

**Supplemental Table 2**

|                                              | Day 1       | Day 2       |
|----------------------------------------------|-------------|-------------|
| Peak heart rate (bpm)                        | 108 ± 19    | 117 ± 15    |
| Peak stroke volume (ml)                      | 46.8 ± 9.7  | 45.2 ± 8.7  |
| Peak cardiac output (L/min/ m <sup>2</sup> ) | 5.0 ± 1.2   | 5.2 ± 0.9   |
| Peak VO <sub>2</sub> (L/min)                 | 1.28 ± 0.38 | 1.32 ± 0.31 |
| Peak VO <sub>2</sub> (ml/kg/min)             | 12.9 ± 2.3  | 13.5 ± 2.2  |
| Respiratory Exchange Ratio (RER)             | 1.05 ± 0.13 | 1.03 ± 0.10 |
| Peak Ventilation (L/min)                     | 51.9 ± 14.3 | 53.6 ± 12.6 |

Peak exercise parameters in HFpEF patients obtained on screening exercise test (day 1) and more comprehensive exercise testing (day 2).
